# Supplementary material
Source: PubMed Central journal article supplement (PMC8489664)
Supplement: NIHMS1742046-supplement-Supplementary_materials.pdf [file NIHMS1742046-supplement-Supplementary_materials.pdf]

# Supplement to “Improving power while controlling the false discovery rate when only a subset of peptides are relevant”

Andy Lin<sup>1</sup>, Deanna L. Plubell<sup>1</sup>, Uri Keich<sup>2</sup>, and William S. Noble<sup>\*1,3</sup>

<sup>1</sup>Department of Genome Sciences, University of Washington, Seattle, WA, USA

<sup>2</sup>School of Mathematics and Statistics, University of Sydney, NSW, Australia

<sup>3</sup>Paul G. Allen School for Computer Science and Engineering, University of Washington, Seattle, WA, USA

\*Corresponding author: Box 355065, Foege Building, S220B, 3720 15th Ave NE, Seattle, WA 98195-5065, william-noble@uw.edu

## Supporting Information

- **Supplemental File S1:** PDF containing pseudocode for the five different search procedures, plus four supplemental tables.
- **Supplemental File S2:** Python script (`filterPSMsByGroup.py`) used to select PSMs for subset search, group FDR, all-sub, and SNS for input into target-decoy competition and subsequent FDR estimation.
- **Supplemental File S3:** Python script (`allSub.py`) used to estimate all-sub q-values.

---

**Algorithm 1 Search-then-select**

---

```
1: procedure SEARCHTHENSELECT( $S, \mathcal{T}, \mathcal{D}, \mathcal{T}_r, \alpha$ )
2:    $(M, P) := \text{SEARCH}(S, \mathcal{T} \cup \mathcal{D})$ 
3:    $A := \text{CONTROLFDR}(M, P, \alpha)$ 
4:    $R := \{(s_i, p_i, m_i) \mid a_i = 1, p_i \in \mathcal{T}_r\}$ 
5:   return R
6: end procedure
```

---

---

**Algorithm 2 Subset-search**

---

```
1: procedure SUBSETSEARCH( $S, \mathcal{T}_r, \mathcal{D}_r, \alpha$ )
2:    $(M, P) := \text{SEARCH}(S, \mathcal{T}_r \cup \mathcal{D}_r)$ 
3:    $A := \text{CONTROLFDR}(M, \alpha)$ 
4:    $R := \{(s_i, p_i, m_i) \mid a_i = 1\}$ 
5:   return R
6: end procedure
```

---

---

**Algorithm 3 Group-FDR**

---

```
1: procedure GROUPEFDR ( $S, \mathcal{T}_r, \mathcal{D}_r, \mathcal{T}_i, \mathcal{D}_i, \alpha$ )
2:    $(M, P) := \text{SEARCH}(S, \mathcal{T}_r \cup \mathcal{T}_i \cup \mathcal{D}_r \cup \mathcal{D}_i)$ 
3:    $(M^1, P^1) := \{(m_i, p_i) \mid p_i \in \mathcal{T}_r \cup \mathcal{D}_r\}$ 
4:    $A := \text{CONTROLFDR}(M^1, \alpha)$ 
5:    $R := \{(s_i^1, p_i^1, m_i^1) \mid a_i = 1\}$ 
6:   return R
7: end procedure
```

---

---

**Algorithm 4 All-sub**

---

```
1: procedure ALLSUB( $S, \mathcal{T}, \mathcal{D}, \mathcal{T}_r, \alpha$ )
2:    $(M, P) := \text{SEARCH}(S, \mathcal{T} \cup \mathcal{D})$ 
3:    $A := \text{CONTROLFDR2}(M, \alpha)$ 
4:    $R := \{(s_i, p_i, m_i) \mid a_i = 1\}$ 
5:   return R
6: end procedure
```

---

---

**Algorithm 5 Subset-neighbor search (SNS)**

---

```
1: procedure SNS ( $S, \mathcal{T}_r, \mathcal{D}_r, \mathcal{T}_n, \mathcal{D}_n, \alpha$ )
2:    $(M, P) := \text{SEARCH}(S, \mathcal{T}_r \cup \mathcal{T}_n \cup \mathcal{D}_r \cup \mathcal{D}_n)$ 
3:    $(M^1, P^1) := \{(m_i, p_i) \mid p_i \in \mathcal{T}_r \cup \mathcal{D}_r\}$ 
4:    $A := \text{CONTROLFDR}(M^1, \alpha)$ 
5:    $R := \{(s_i^1, p_i^1, m_i^1) \mid a_i = 1\}$ 
6:   return R
7: end procedure
```

---

| file name             | # scans |
|-----------------------|---------|
| UPS1_12500amol_R1.ms2 | 39718   |
| UPS1_12500amol_R2.ms2 | 39682   |
| UPS1_12500amol_R3.ms2 | 39782   |
| UPS1_25000amol_R1.ms2 | 40856   |
| UPS1_25000amol_R2.ms2 | 40512   |
| UPS1_25000amol_R3.ms2 | 40439   |
| UPS1_50000amol_R1.ms2 | 41833   |
| UPS1_50000amol_R2.ms2 | 41653   |
| UPS1_50000amol_R3.ms2 | 41665   |
| UPS1_5000amol_R1.ms2  | 37918   |
| UPS1_5000amol_R2.ms2  | 38046   |
| UPS1_5000amol_R3.ms2  | 38052   |

Table S1: **yeast/UPS1 data**. The number of scans found in each run. This is for the samples where UPS1 was spiked into yeast.

| *file name           | cultivar             | preparation method | # scans | *file name         | cultivar | preparation method | # scans |
|----------------------|----------------------|--------------------|---------|--------------------|----------|--------------------|---------|
| Zanz_1_1_03Jun16     | <i>Zanzibarensis</i> | M0                 | 15735   | GCH4_1_1_03Jun16   | GCH4     | M0                 | 21634   |
| Zanz_1_2_03Jun16     | <i>Zanzibarensis</i> | M0                 | 17138   | GCH4_1_2_03Jun16   | GCH4     | M0                 | 16765   |
| Zanz_1_3_03Jun16     | <i>Zanzibarensis</i> | M0                 | 18834   | GCH4_1_3_03Jun16   | GCH4     | M0                 | 18663   |
| Zanz_2_1_03Jun16     | <i>Zanzibarensis</i> | M0                 | 19760   | GCH4_2_1_03Jun16   | GCH4     | M0                 | 19830   |
| Zanz_2_2_03Jun16     | <i>Zanzibarensis</i> | M0                 | 18986   | GCH4_2_2_03Jun16   | GCH4     | M0                 | 24944   |
| Zanz_2_3_03Jun16     | <i>Zanzibarensis</i> | M0                 | 16222   | GCH4_2_3_03Jun16   | GCH4     | M0                 | 21667   |
| Zanz_3_1_03Jun16     | <i>Zanzibarensis</i> | M0                 | 18900   | GCH4_3_1_03Jun16   | GCH4     | M0                 | 20267   |
| Zanz_3_2_03Jun16     | <i>Zanzibarensis</i> | M0                 | 21368   | GCH4_3_2_03Jun16   | GCH4     | M0                 | 22246   |
| Zanz_3_3_03Jun16     | <i>Zanzibarensis</i> | M0                 | 20315   | GCH4_3_3_03Jun16   | GCH4     | M0                 | 25330   |
| TMVCH1_1_1_03Jun16   | TMVCH1               | M0                 | 14893   | 200_1_03Jun16      | 200      | M0                 | 13742   |
| TMVCH1_1_2_03Jun16   | TMVCH1               | M0                 | 20086   | 200_2_03Jun16      | 200      | M0                 | 17822   |
| TMVCH1_1_3_03Jun16   | TMVCH1               | M0                 | 23470   | 200_3_03Jun16      | 200      | M0                 | 6158    |
| TMVCH1_2_1_03Jun16   | TMVCH1               | M0                 | 19125   | 5952_1_03Jun16     | 592      | M0                 | 14951   |
| TMVCH1_2_2_03Jun16   | TMVCH1               | M0                 | 23804   | 592_2_03Jun16      | 592      | M0                 | 16157   |
| TMVCH1_2_3_03Jun16   | TMVCH1               | M0                 | 20689   | 592_3_03Jun16      | 592      | M0                 | 14125   |
| TMVCH1_3_1_03Jun16   | TMVCH1               | M0                 | 16456   | 611_1_03Jun16      | 611      | M0                 | 10724   |
| TMVCH1_3_2_03Jun16   | TMVCH1               | M0                 | 25938   | 611_2_03Jun16      | 611      | M0                 | 13621   |
| TMVCH1_3_3_03Jun16   | TMVCH1               | M0                 | 16414   | 611_3_03Jun16      | 611      | M0                 | 8454    |
| 1_M0_AM_R1_7Mar16    | PNNL                 | M0                 | 5076    | 829_1_03Jun16      | 829      | M0                 | 17343   |
| 2_M2_JA_R3_7Mar16    | PNNL                 | M2                 | 16784   | 3_M0_JA_R3_7Mar16  | 829      | M0                 | 18592   |
| 3_M0_JA_R3_7Mar16    | PNNL                 | M0                 | 15859   | 829_3_03Jun16      | 829      | M0                 | 9475    |
| 3_M0_JA_R3_B_03Jun16 | PNNL                 | M0                 | 22015   | 8_M1_JA_R2_7Mar16  | PNNL     | M1                 | 15669   |
| 4_M1_AM_R1_7Mar16    | PNNL                 | M1                 | 13188   | 9_M4_AM_R1_7Mar16  | PNNL     | M4                 | 14892   |
| 5_M2_AM_R1_7Mar16    | PNNL                 | M2                 | 15358   | 9_M4_JA_R2_7Mar16  | PNNL     | M4                 | 16140   |
| 6_M0_JA_R2_7Mar16    | PNNL                 | M0                 | 16728   | 9_M4_JA_R3_7Mar16  | PNNL     | M4                 | 15472   |
| 6_M0_JA_R2_B_03Jun16 | PNNL                 | M0                 | 21544   | 10_M2_JA_R2_7Mar16 | PNNL     | M2                 | 18358   |
| 7_M1_JA_R3_7Mar16    | PNNL                 | M1                 | 17973   | 16_M3_03Jun16      | PNNL     | M3                 | 20583   |

Table S2: **Ricin data.** The number of scans found in each ricin run. \*All file names start with "Rcom\_" and end with either "\_Samwise\_16-03-32.ms2" or "\_Samwise\_15-08-55.ms2".

| file name                      | # scans |
|--------------------------------|---------|
| 217_2018_ZBS6_HeLa_ISD_1.ms2   | 89162   |
| 220_2018_ZBS6_HeLa_SPEED_1.ms2 | 87981   |
| 222_2018_ZBS6_HeLa_FASP_2.ms2  | 87398   |
| 223_2018_ZBS6_HeLa_ISD_2.ms2   | 86869   |
| 225_2018_ZBS6_HeLa_SP3_2.ms2   | 90238   |
| 226_2018_ZBS6_HeLa_SPEED_2.ms2 | 88086   |
| 228_2018_ZBS6_HeLa_FASP_3.ms2  | 87255   |
| 229_2018_ZBS6_HeLa_ISD_3.ms2   | 87835   |
| 231_2018_ZBS6_HeLa_SP3_3.ms2   | 90546   |
| 232_2018_ZBS6_HeLa_SPEED_3.ms2 | 87703   |
| 234_2018_ZBS6_HeLa_FASP_1.ms2  | 87797   |
| 235_2018_ZBS6_HeLa_SP3_1.ms2   | 89253   |

Table S3: **Human data.** The number of scans found in each run.

| file name                | # scans |
|--------------------------|---------|
| OR20070924_S_mix7_02.ms2 | 4966    |
| OR20070924_S_mix7_03.ms2 | 5109    |
| OR20070924_S_mix7_04.ms2 | 5094    |
| OR20070924_S_mix7_05.ms2 | 5148    |
| OR20070924_S_mix7_06.ms2 | 5170    |
| OR20070924_S_mix7_07.ms2 | 5164    |
| OR20070924_S_mix7_08.ms2 | 5268    |
| OR20070924_S_mix7_09.ms2 | 5159    |
| OR20070924_S_mix7_10.ms2 | 5257    |
| OR20070924_S_mix7_11.ms2 | 957     |

Table S4: **ISB18 data.** The number of scans found in each run.
